# Supplementary figures and images for: Photolysis of the nonsteroidal anti-inflammatory drug sulindac: elucidation of kinetic behaviour and photodegradation pathways in water
Source: Royal Society of Chemistry journal article supplement (doi:10.1039/d1em00167a), 2021-01-01

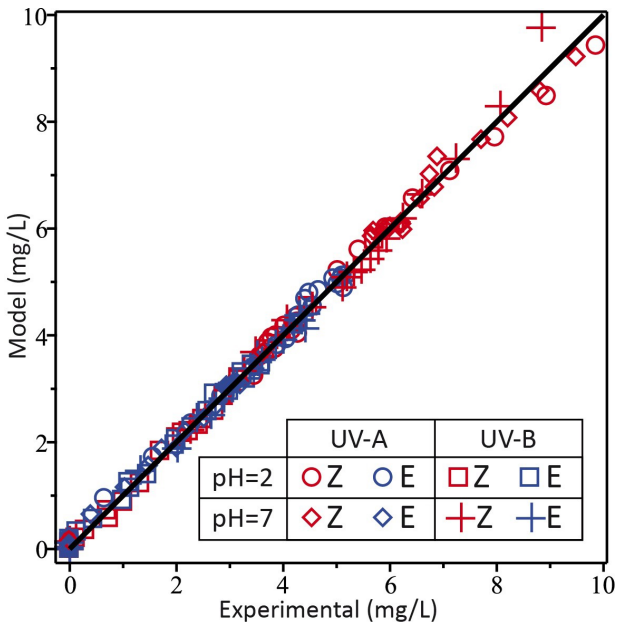

Supplement: d1em00167a4.pdf [file d1em00167a4.pdf]

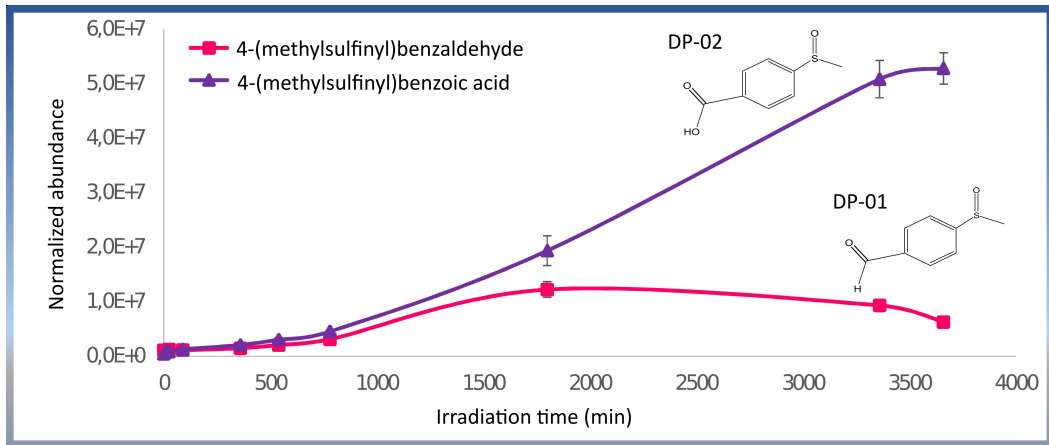

Supplement: d1em00167a5.pdf [file d1em00167a5.pdf]
